# Supplementary material for: Nuclear microenvironments modulate transcription from low-affinity enhancers
Source: eLife journal article supplement (doi:10.7554/elife.28975), 2017-11-02

**A**

Active Pol II

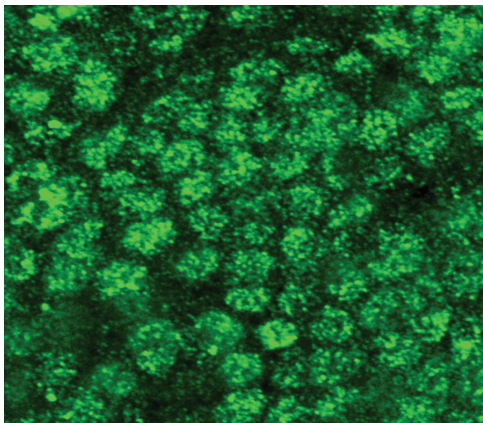**B**

Active Pol II, Ubx

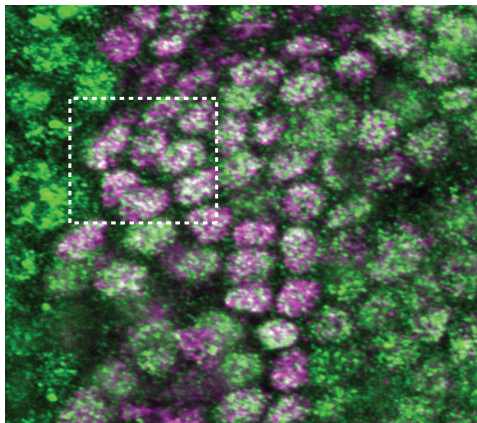**C**

Active Pol II, Ubx

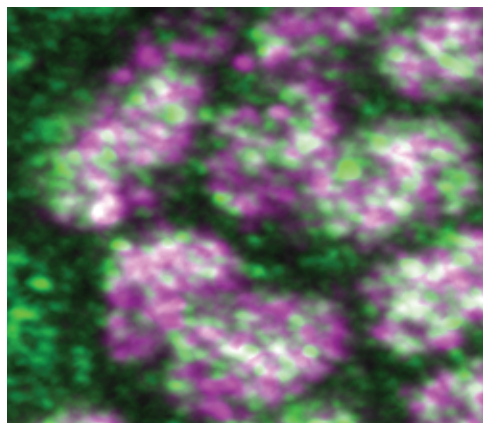**D**

H3K4me3

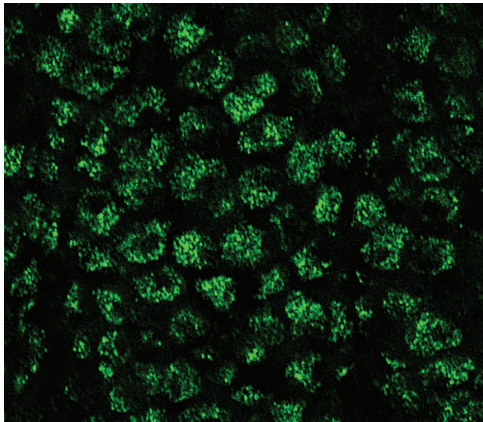**E**

H3K4me3, Ubx

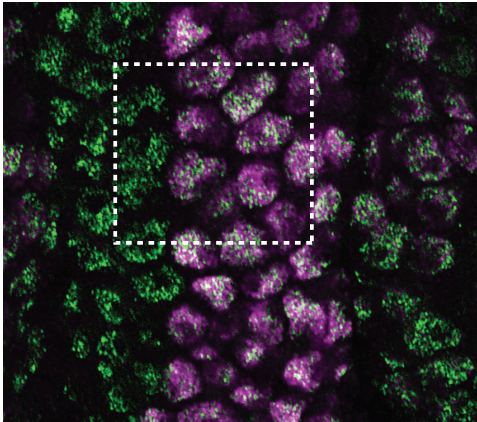**F**

H3K4me3, Ubx

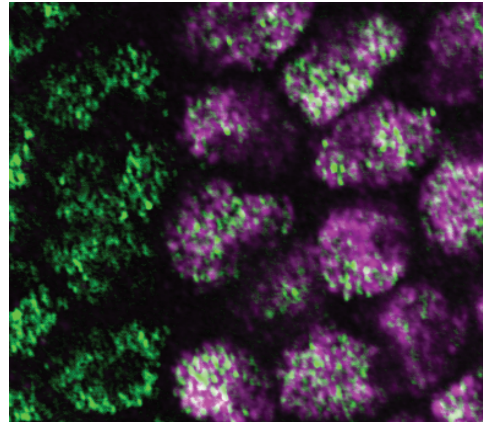**G**

H3K27me3

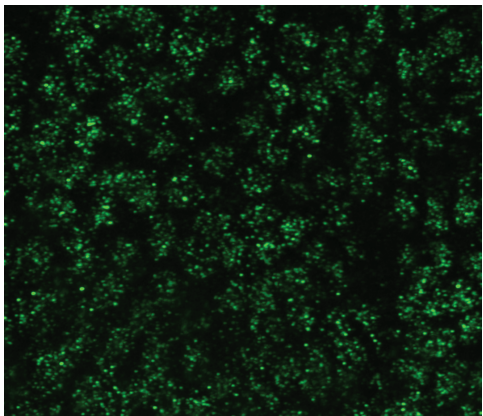**H**

H3K27me3, Ubx

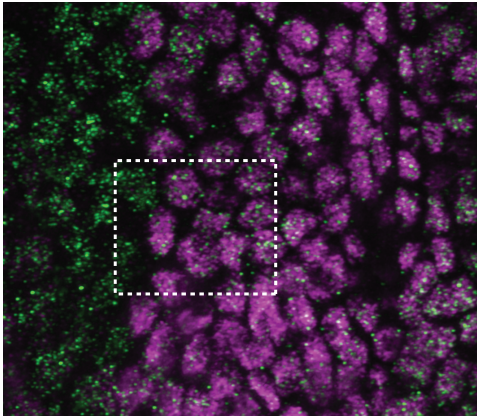**I**

H3K27me3, Ubx

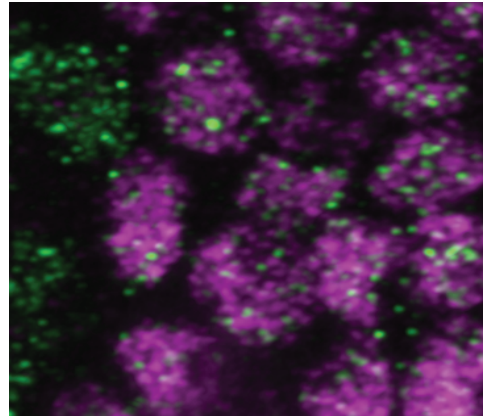

Supplement: supp [file elife_poa_e28975_Figure_1_figure_supplement_3.pdf › elife_poa_e28975_Figure_1_figure_supplement_3.pdf]
