# Supplementary figures and images for: Nuclear microenvironments modulate transcription from low-affinity enhancers
Source: eLife journal article supplement (doi:10.7554/elife.28975), 2017-11-02

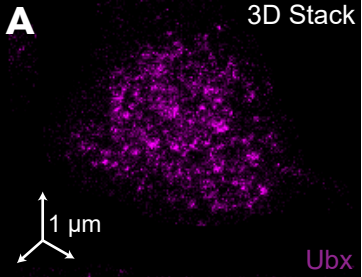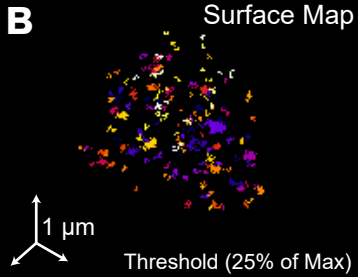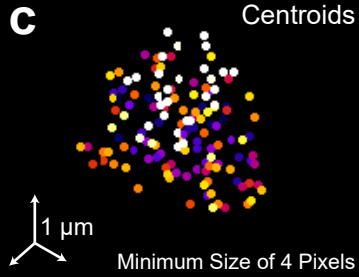

Supplement: supp [file elife_poa_e28975_Figure_1_figure_supplement_1.pdf › elife_poa_e28975_Figure_1_figure_supplement_1.pdf]

**A**

En, Ubx

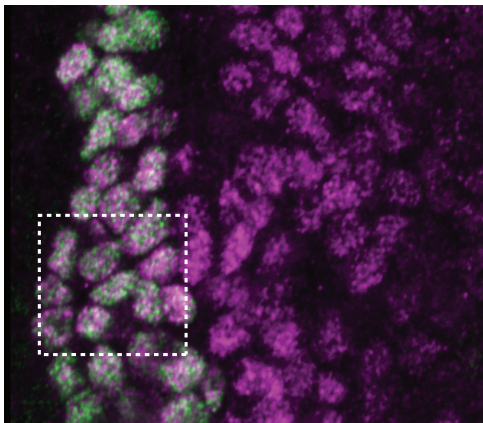**B**

En

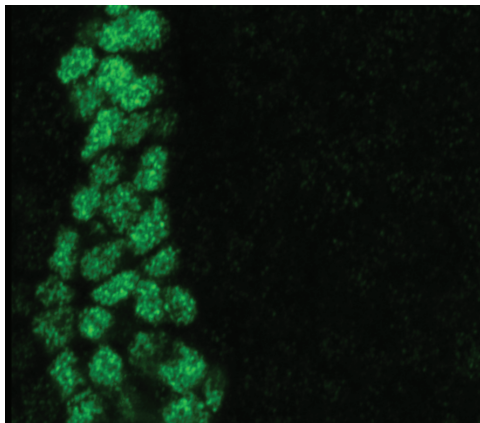**C**

En, Ubx

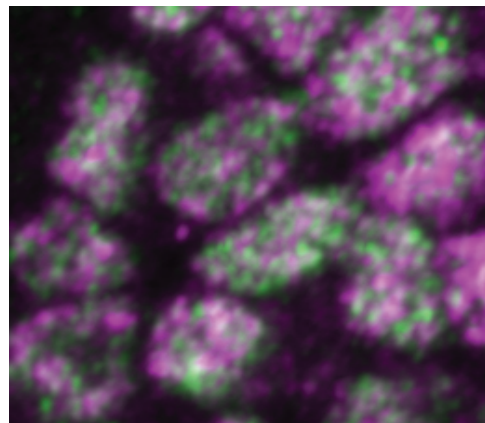**D**

Eve, Ubx

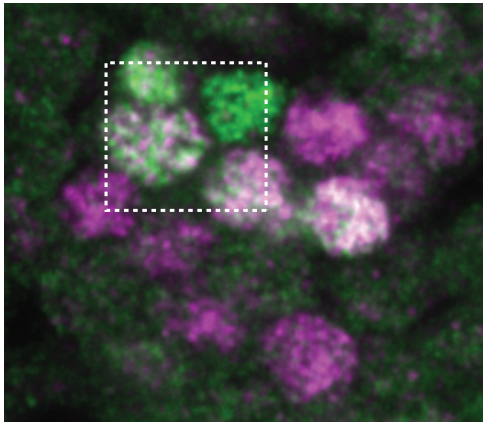**E**

Eve

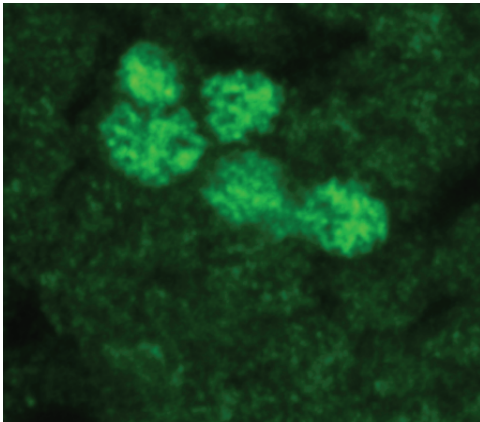**F**

Eve, Ubx

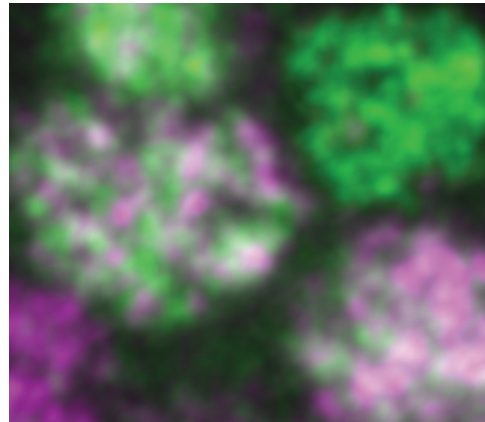**G**

AbdA, Ubx

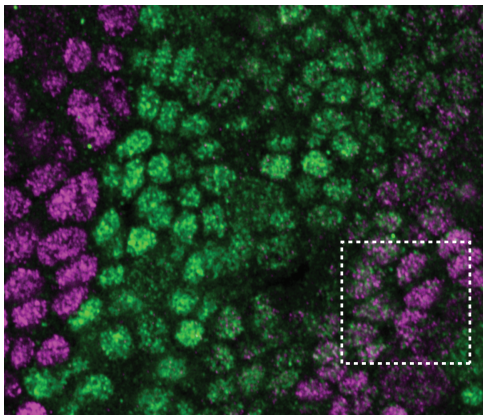**H**

AbdA

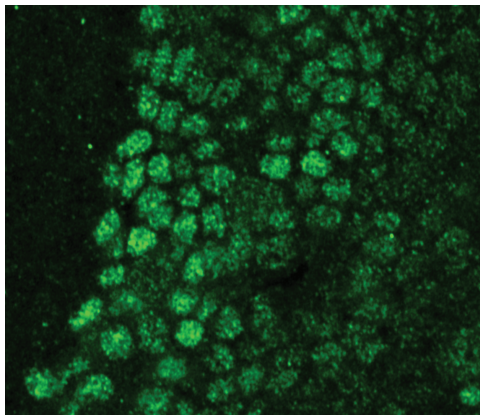**I**

AbdA, Ubx

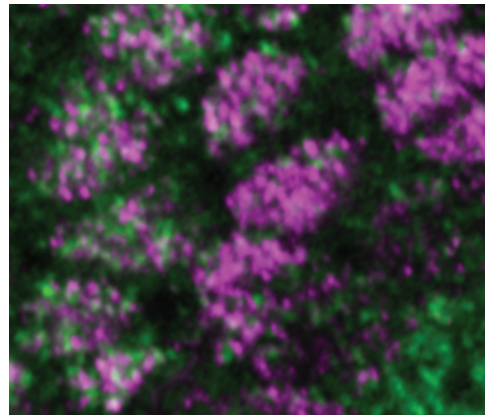

Supplement: supp [file elife_poa_e28975_Figure_1_figure_supplement_2.pdf › elife_poa_e28975_Figure_1_figure_supplement_2.pdf]

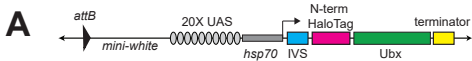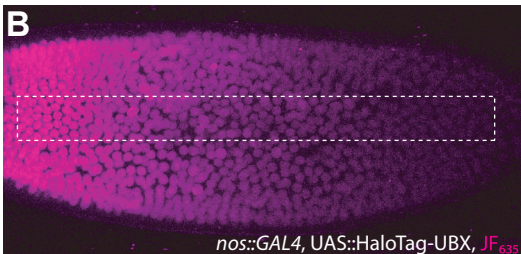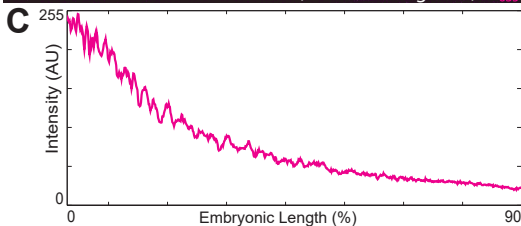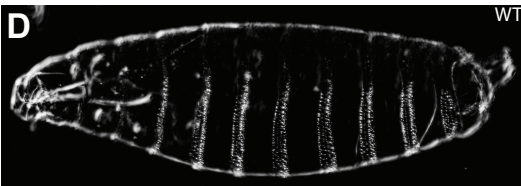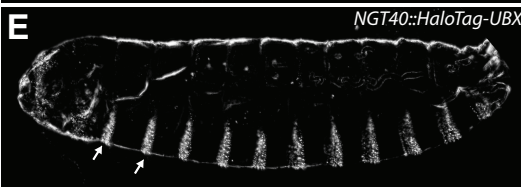

Supplement: supp [file elife_poa_e28975_Figure_1_figure_supplement_4.pdf › elife_poa_e28975_Figure_1_figure_supplement_4.pdf]

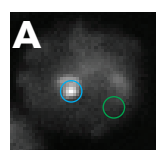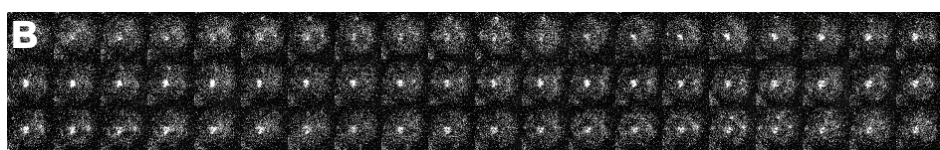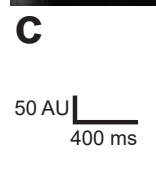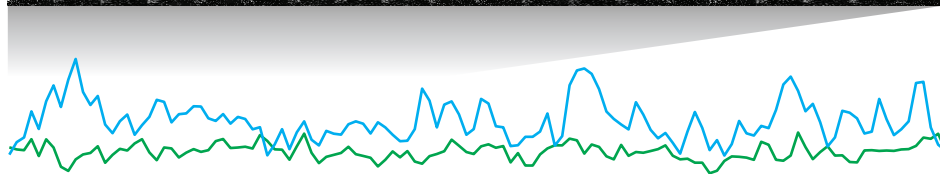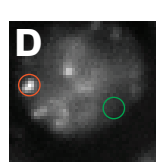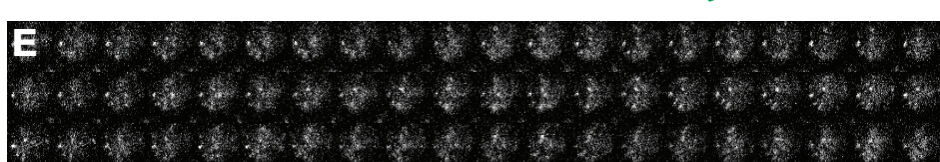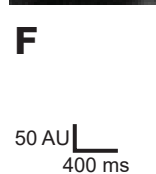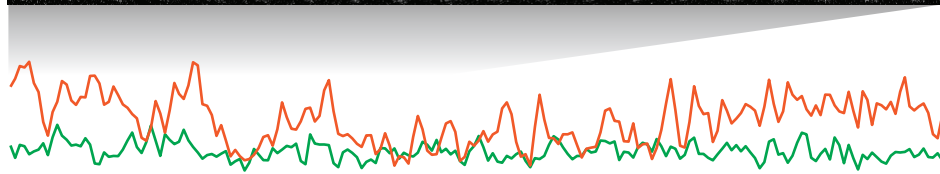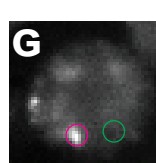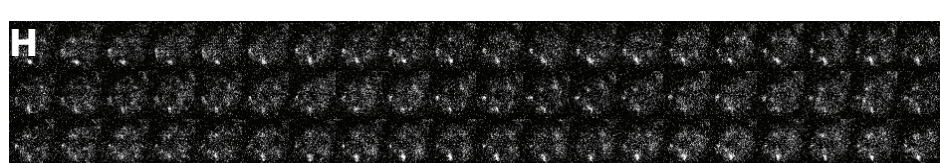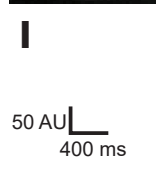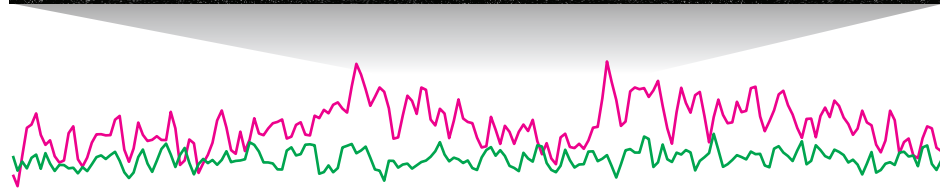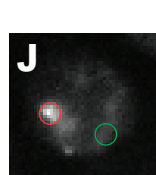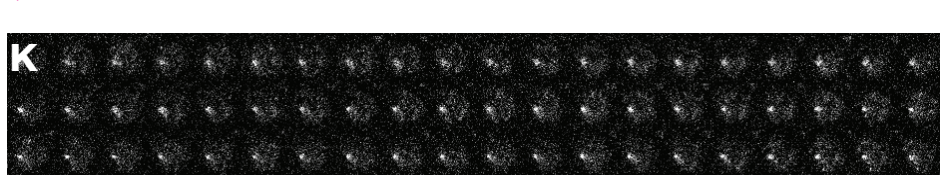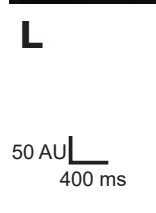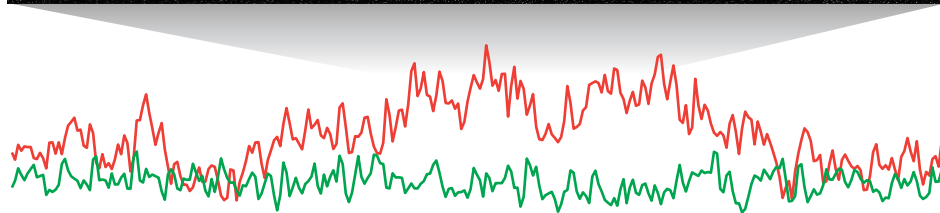

Supplement: supp [file elife_poa_e28975_Figure_1_figure_supplement_5.pdf › elife_poa_e28975_Figure_1_figure_supplement_5.pdf]

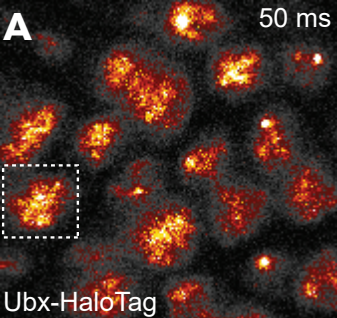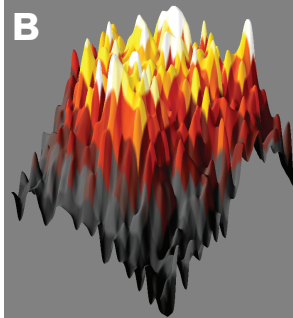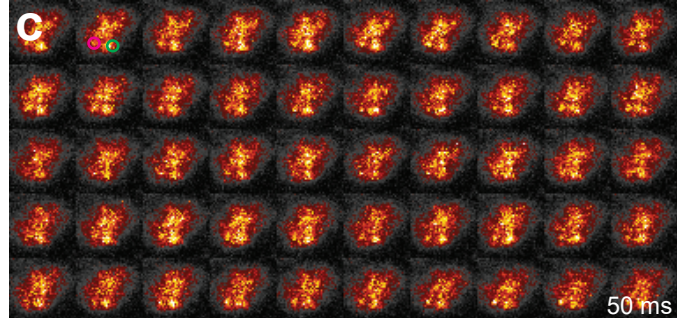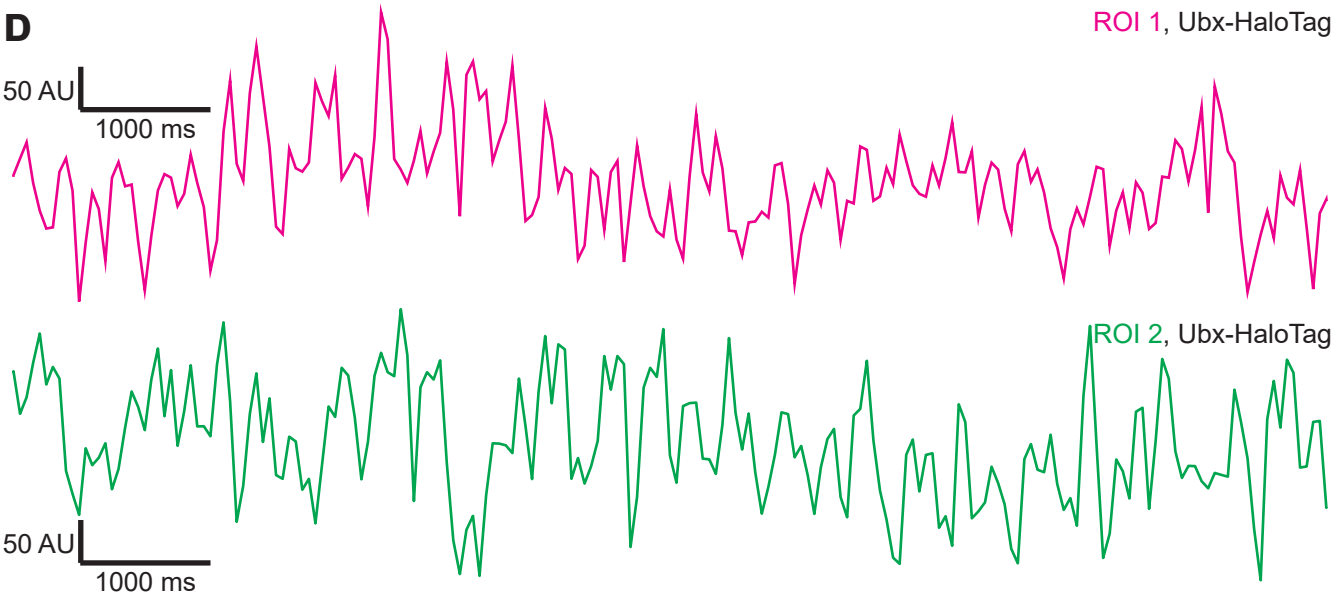

Supplement: supp [file elife_poa_e28975_Figure_1_figure_supplement_6.pdf › elife_poa_e28975_Figure_1_figure_supplement_6.pdf]

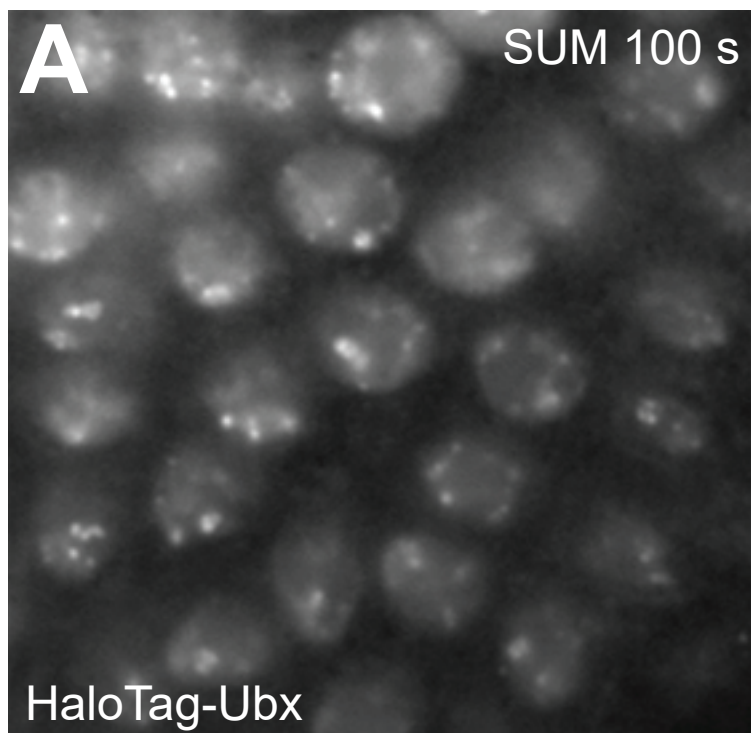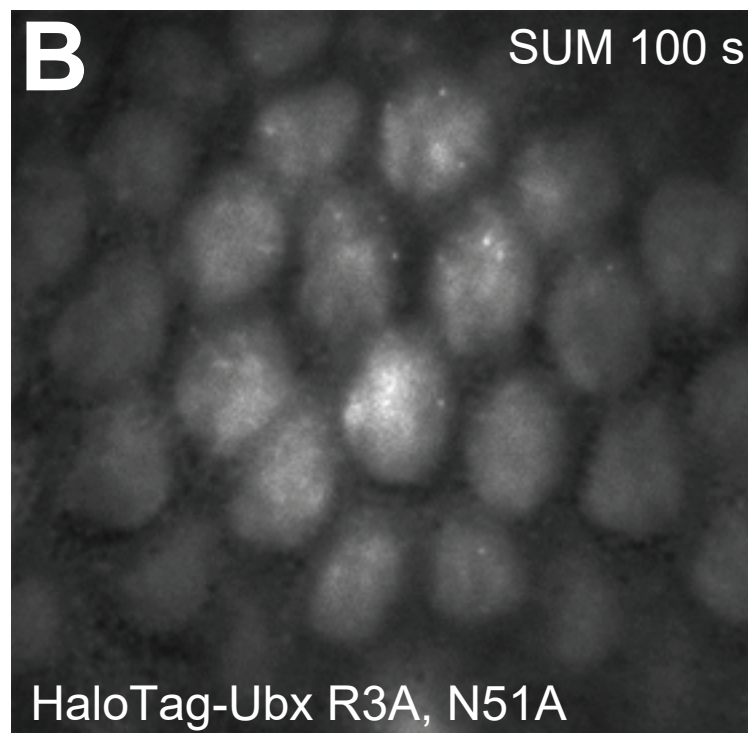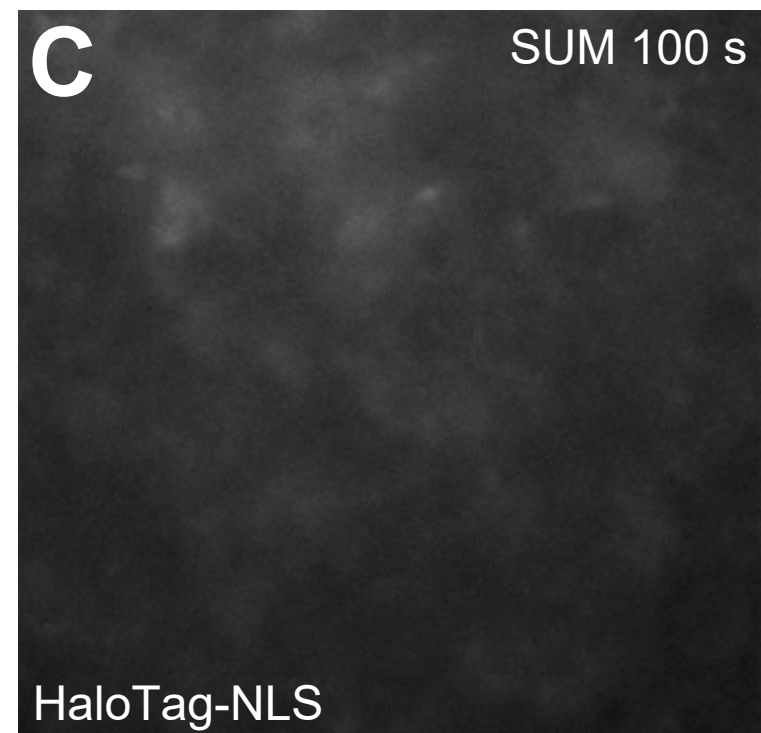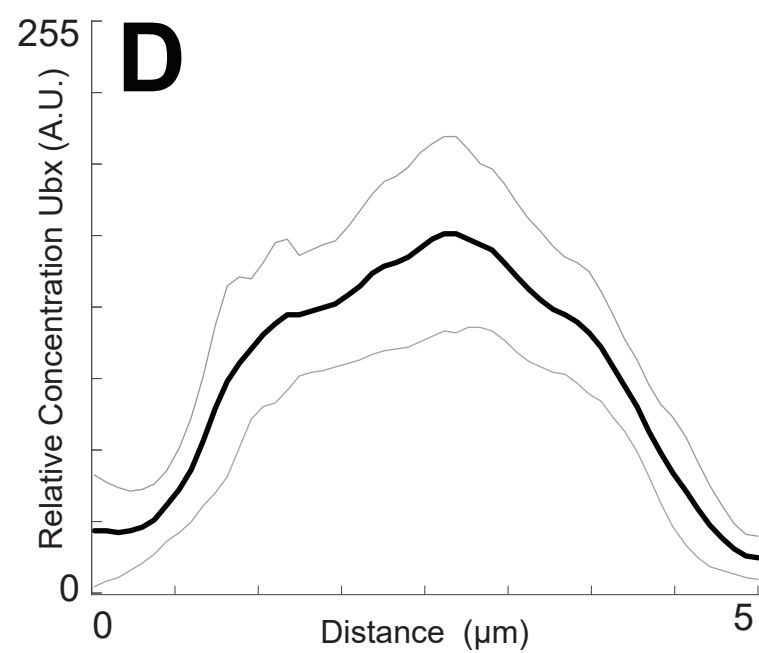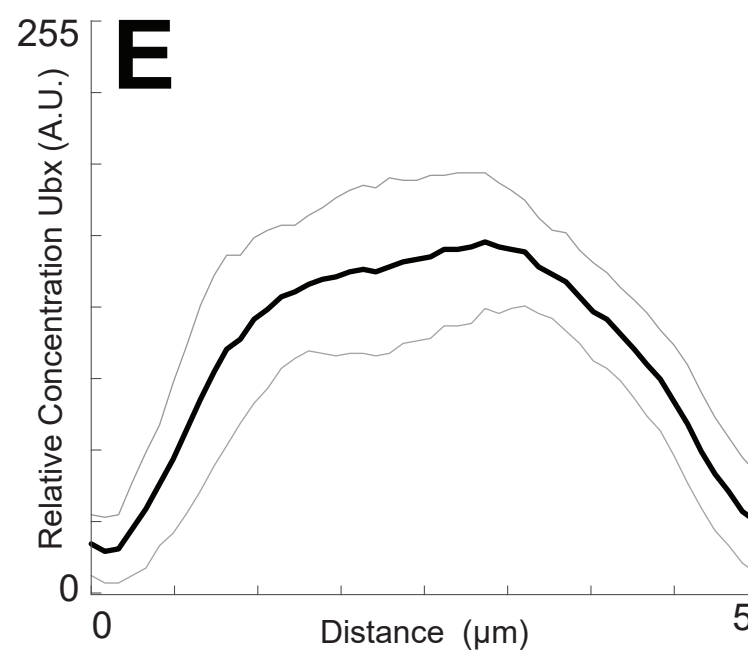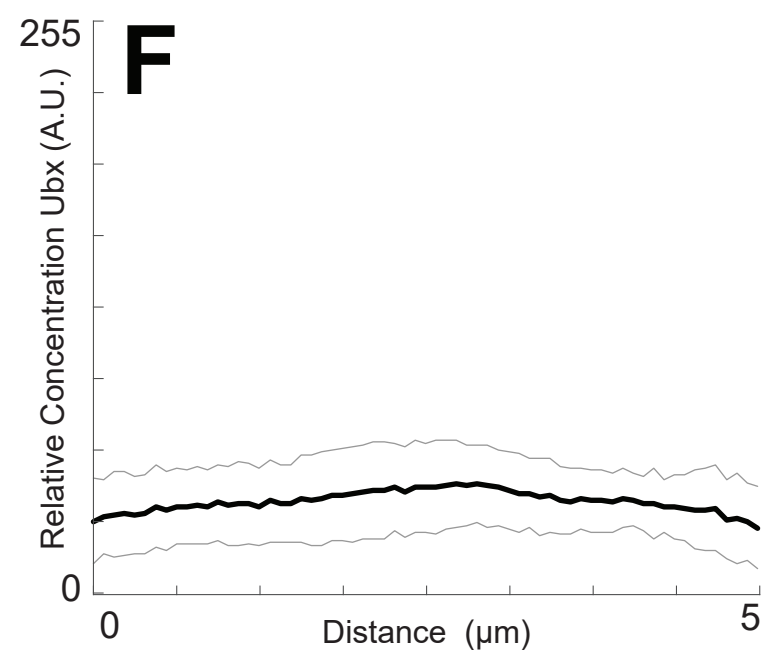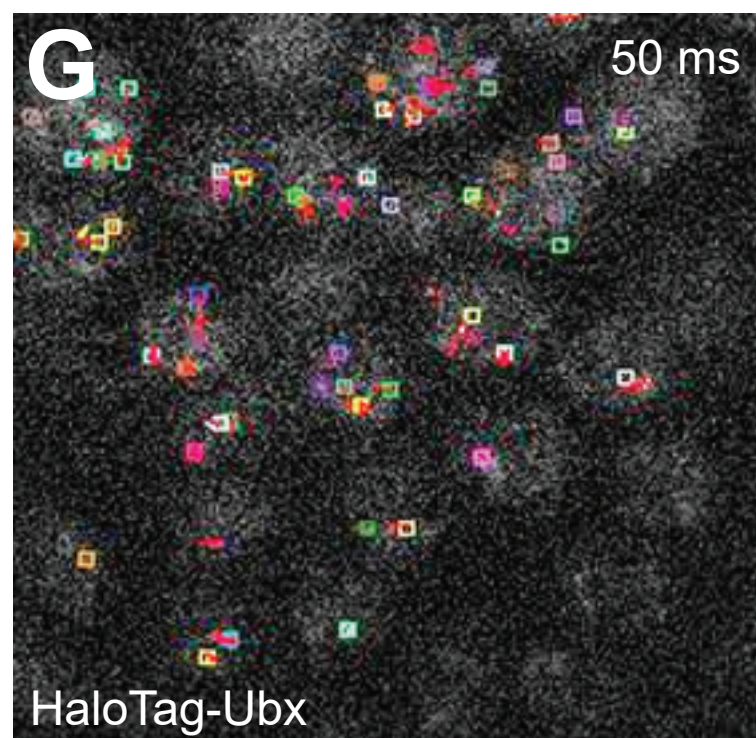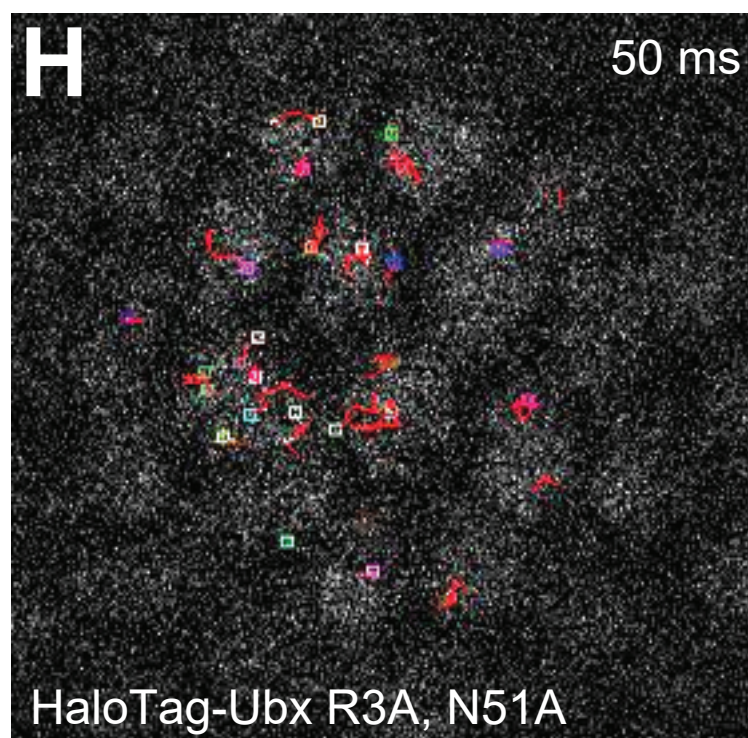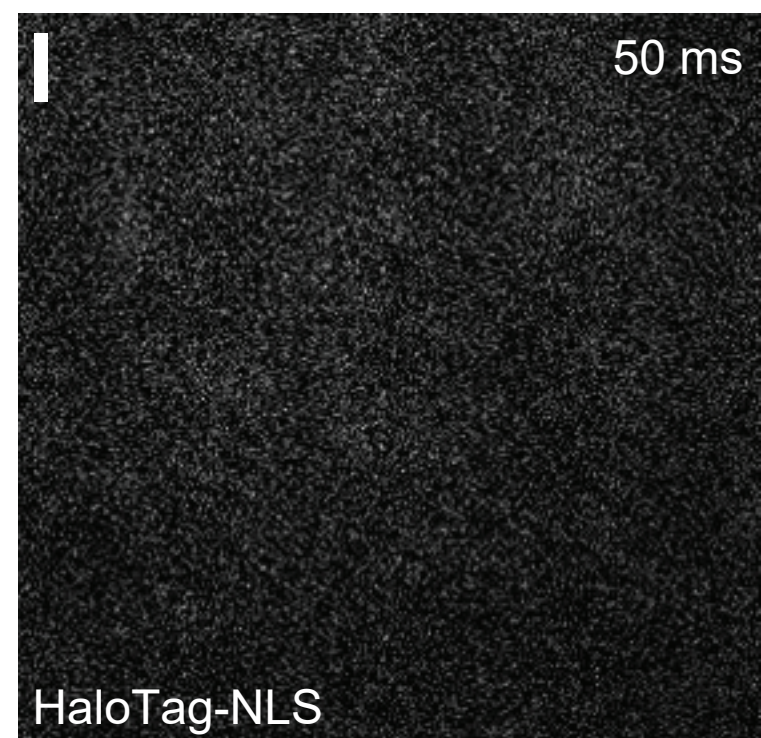

Supplement: supp [file elife_poa_e28975_Figure_1_figure_supplement_7.pdf › elife_poa_e28975_Figure_1_figure_supplement_7.pdf]

**A**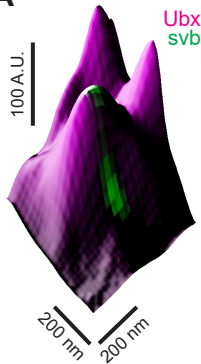**B**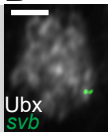**C**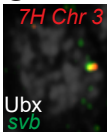**D**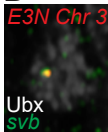**E**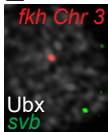**F**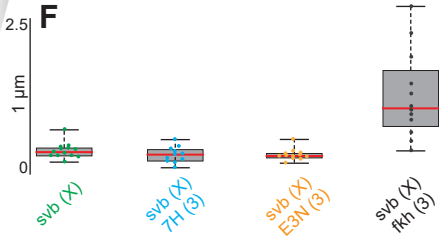

Supplement: supp [file elife_poa_e28975_Figure_2_figure_supplement_1.pdf › elife_poa_e28975_Figure_2_figure_supplement_1.pdf]

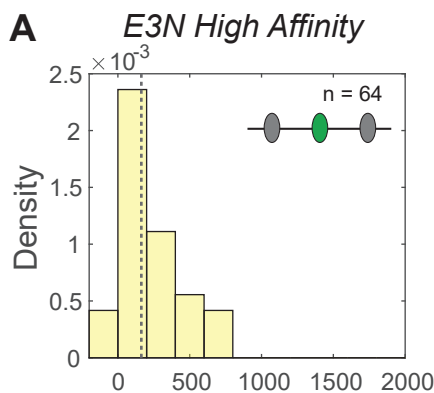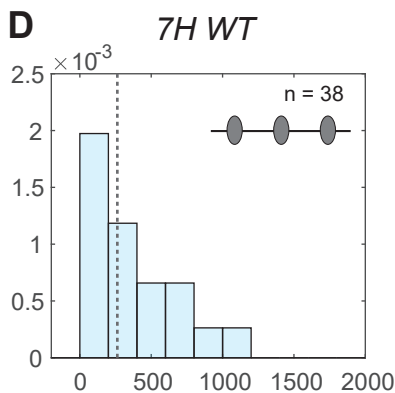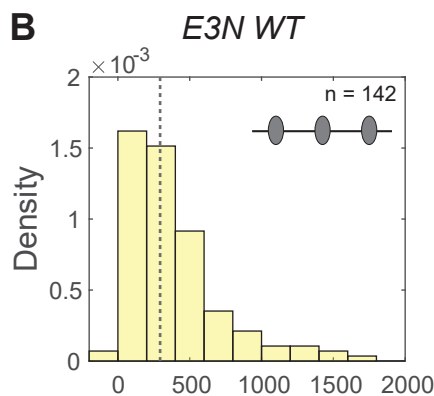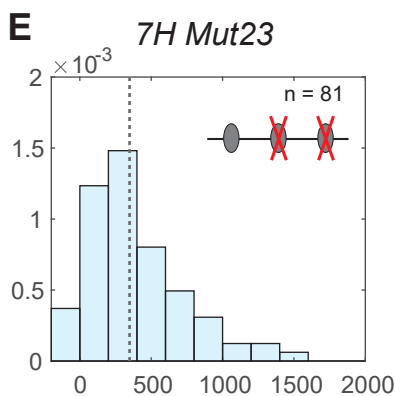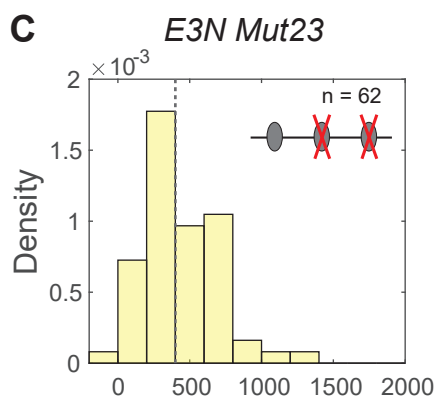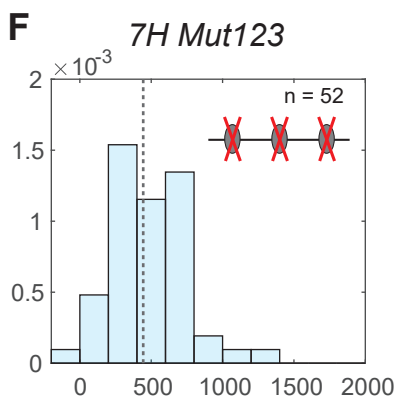

Background-Subtracted Ubx Intensity  
at the Transcription Site (A.U.)

Supplement: supp [file elife_poa_e28975_Figure_3_figure_supplement_1.pdf › elife_poa_e28975_Figure_3_figure_supplement_1.pdf]
